# Supplementary material for: Identification of a non-exported Plasmepsin V substrate that functions in the parasitophorous vacuole of malaria parasites
Source: PubMed Central journal article supplement (PMC10790765; doi:10.1128/mbio.01223-23), 2023-12-11
Supplement: mbio.01223-23-s0005.pdf [file mbio.01223-23-s0005.pdf]

Supplementary Figure 5

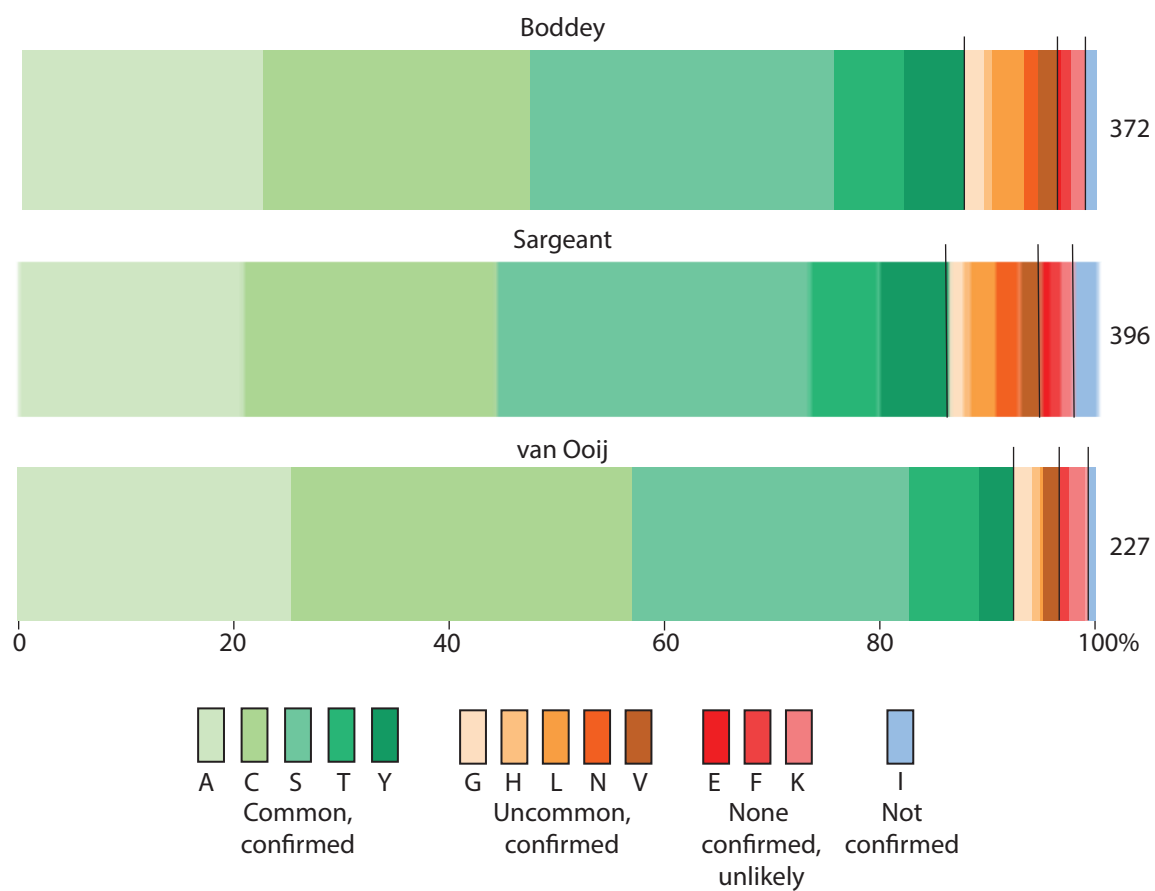

Supplementary Figure 5. Overview of prevalence of N-terminal amino acids in position 4 of the PEXEL in proteins identified in three different exportomes.
